# Supplementary material
Source: publisher figshare collection journal article supplement (https://rs.figshare.com/ndownloader/files/14877272)
Supplement: Supplementary file [file 14877272]

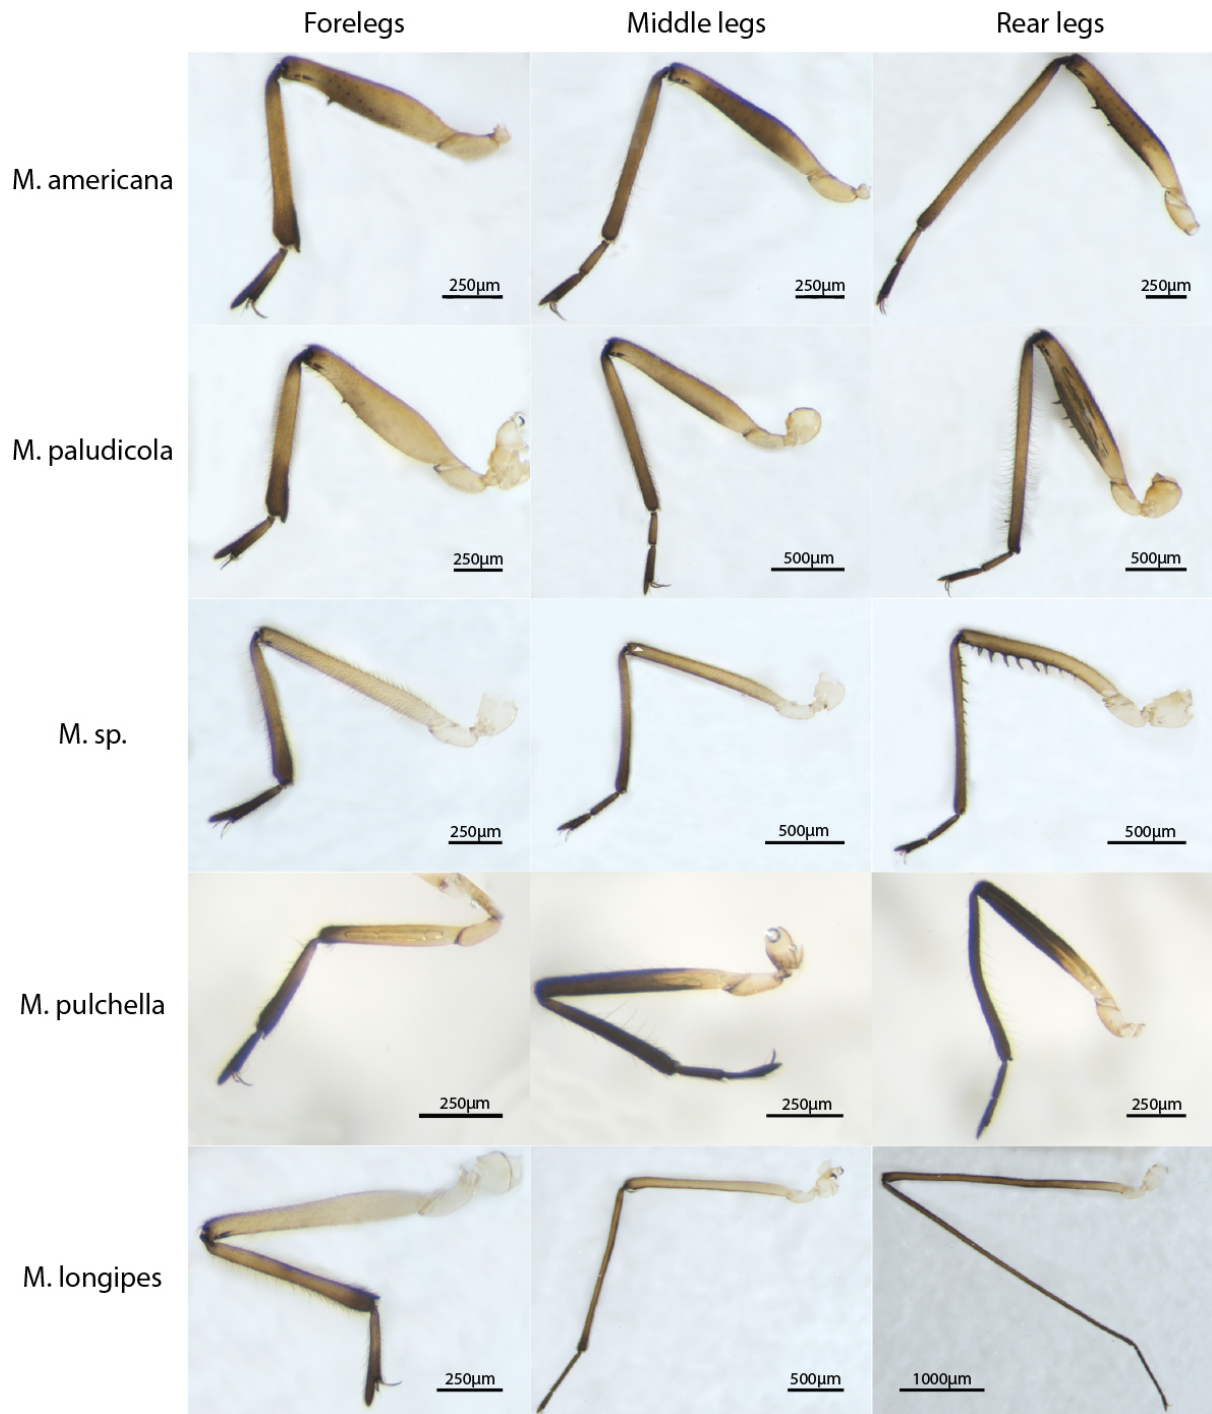

**Supplementary figure 1:** Comparative morphology of the legs across *Microvelia* species sample in figure 1. Note the presence of grasping traits on male legs in *Microvelia americana*, *Microvelia paludicola* and *Microvelia sp.* These traits are absent in *Microvelia longipes* and *Microvelia pulchella*.

|                              |                                                                                                          |                                                                                                                 |                                                                                                            |                                                                                                                                            |
|------------------------------|----------------------------------------------------------------------------------------------------------|-----------------------------------------------------------------------------------------------------------------|------------------------------------------------------------------------------------------------------------|--------------------------------------------------------------------------------------------------------------------------------------------|
| <i>Microvelia longipes</i>   | ① Male calling<br>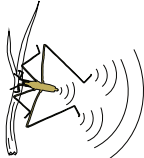      | ② Male fighting on floater<br> | ③ Mating on floater<br>  | ④ Female laying on floaters & Male guarding<br>         |
| <i>Microvelia pulchella</i>  | ① Male calling<br>      | ② Male fighting on floater<br> | ③ Mating on floater<br> | ④ Female laying on floaters & Male guarding<br>         |
| <i>Microvelia</i> sp.        | ① No male calling<br>   | ② Male fighting randomly<br>   | ③ Mating randomly<br>    | ④ Female laying on floaters & No male guarding<br>      |
| <i>Microvelia americana</i>  | ① No male calling<br>  | ② Male fighting randomly<br>  | ③ Mating randomly<br>   | ④ No female laying on floaters & Male guarding<br>     |
| <i>Microvelia paludicola</i> | ① No male calling<br> | ② Male fighting randomly<br> | ③ Mating randomly<br>  | ④ No female laying on floaters & No male guarding<br> |

**Supplementary figure 2:** Schematic summary representation of the mating systems in the five *Microvelia* species

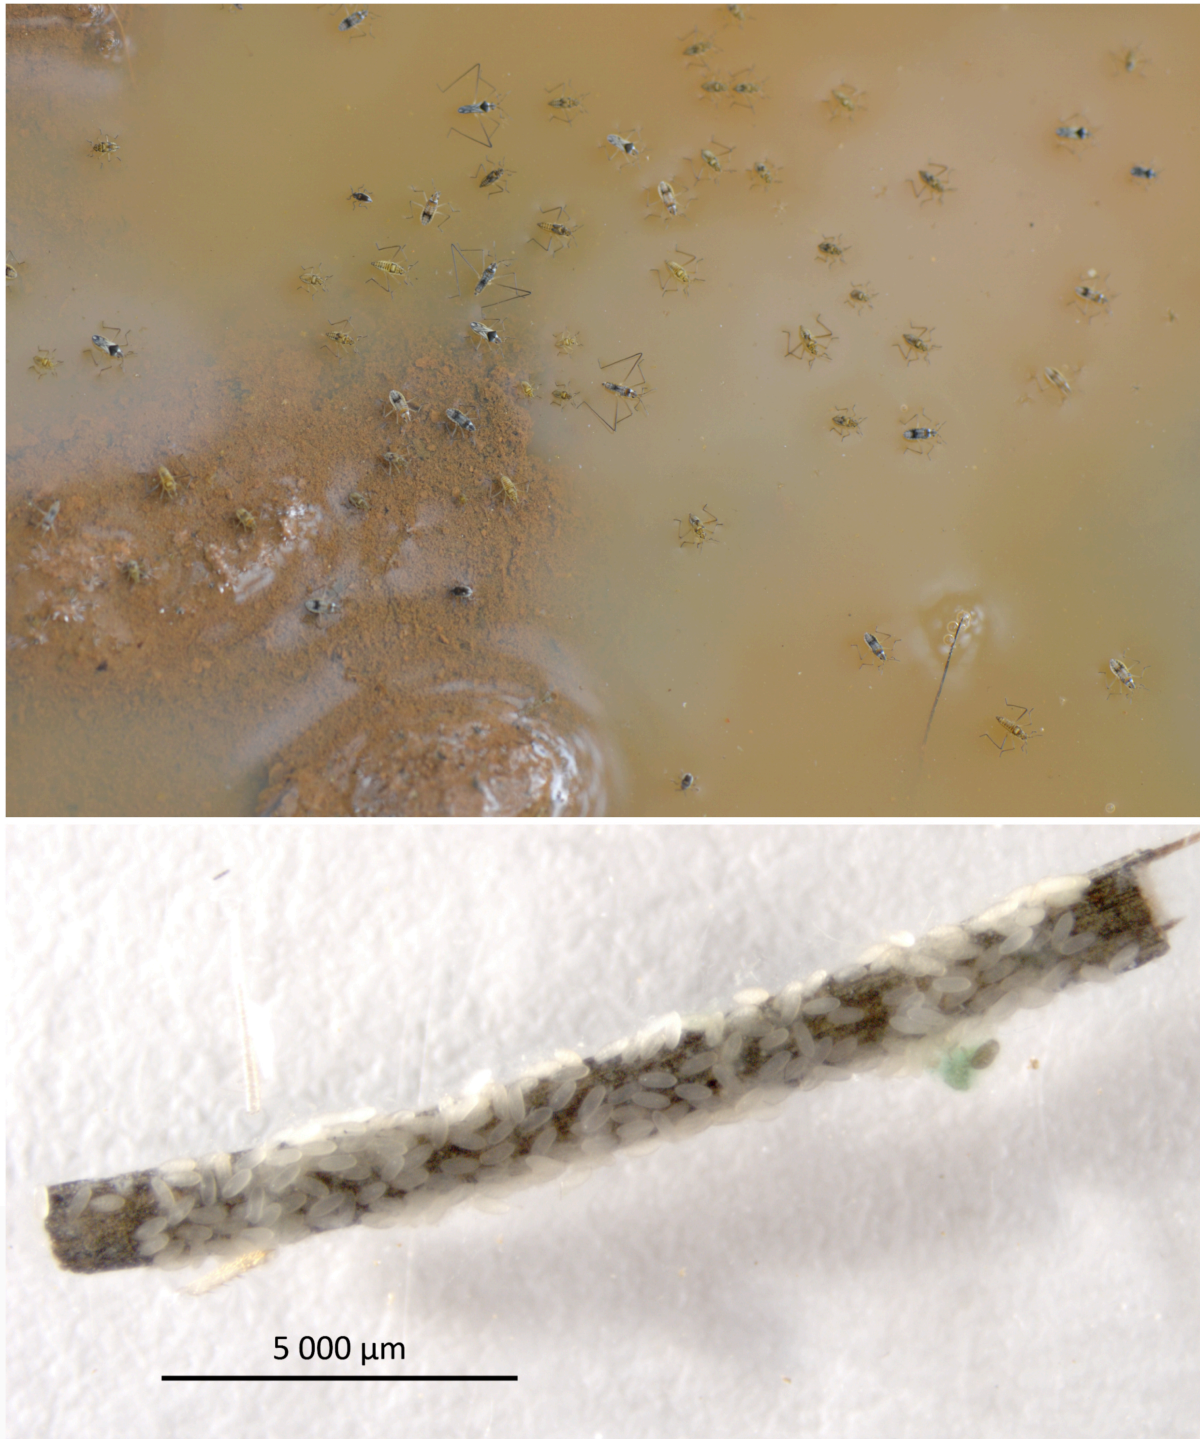

**Supplementary figure 3:** *M. longipes* natural habitat. Top panel: Example of rain-filled puddle in French Guyana in Crique Patate near Cayenne where *M. longipes* population was collected. Middle panel: Zoom on the floating substrates deposited on the water surface of the puddle. Bottom panel: Example of floater full of *M. longipes* eggs. Scale bar represents 5mm.



March 25, 2018

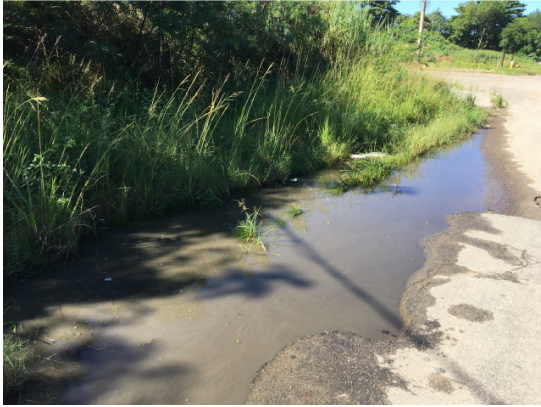

March 30, 2018

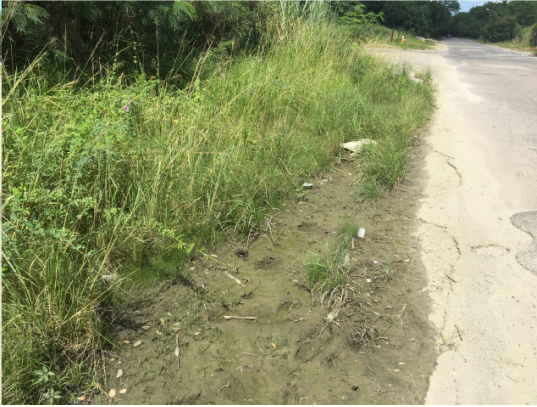

**Supplementary figure 4:** Fluctuating *Microvelia longipes* environment. Pictures of a rain-filled puddle in Rio de Janeiro where a *M. longipes* natural population was collected. The puddle dried out entirely in a period of five days.

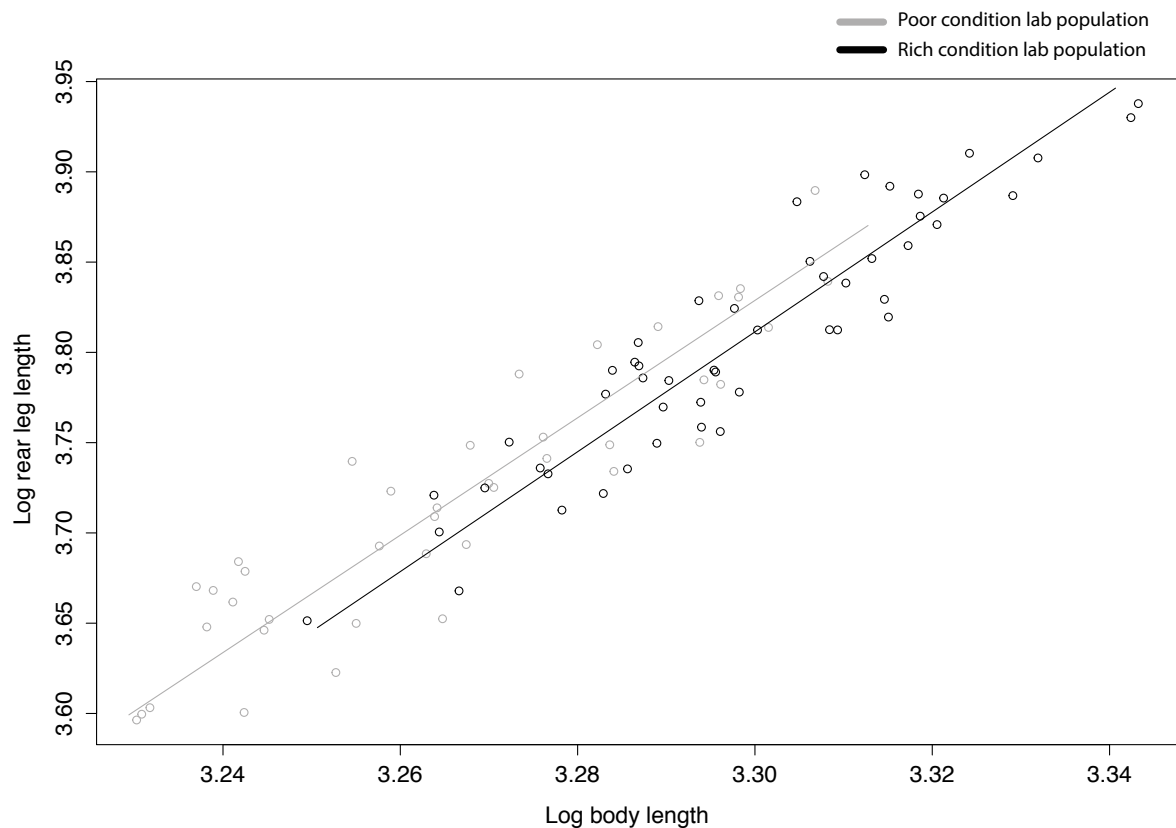

**Supplementary figure 5:** Nutrition effects on body-leg scaling relationships in the lab population. Static allometry on log-transformed data between rear leg and body lengths for unselected adult individuals fed on rich (black) and poor (grey) diets.

### Supplementary tables' legends

**Supplementary table 1:** Morphometric data and associated statistical tests. Summary table of the adult measurements and statistical tests for all *Microvelia* species.

**Supplementary table 2:** Tests for normal distribution in all *M. longipes* conditions. Values of Shapiro tests and associated p-values for each *M. longipes* adult population reared in different conditions.

**Supplementary table 3:** Phylogenetic signals. Summary table of all tested characters and associated statistical tests of the phylogenetic signals.

**Supplementary table 4:** Summary table male competition in *M. longipes*. Table indicating the leg lengths, winning success and the group of all males used in the experiment (see methods for more details). Associated statistics are also reported.

**Supplementary table 5:** Fight frequency between *M. longipes* and *M. pulchella* males. Summary table of the number of fights in *M. longipes* and *M. pulchella* males in the different conditions for a period of one hour. Below are the associated statistical tests for differences in fight frequency.

**Supplementary table 6:** Counts and genotypes of the total number of eggs laid by females in each condition. A second excel sheet reports the tables of the summary statistics.

**Supplementary table 7:** Statistical tests associated with differences in leg length and scaling relationships between artificially selected and nutritionally manipulated *M. longipes* populations.

**Supplementary table 8:** Table containing the primer sequences, the full sequence, the motif and the length of each tested microsatellite.

**Supplementary table 9:** Table PCR protocols for microsatellite amplifications and single individual genotyping.

Supplementary table 10: Accession numbers of the 14 molecular marker sequences used in the phylogeny.

### **Supplementary videos' caption**

**Supplementary video 1:** *M. longipes* male vibrations in slow motion.

**Supplementary video 2:** *M. longipes* mating system.

**Supplementary video 3:** *M. pulchella* mating system.

**Supplementary video 4:** *M. sp.* mating system.
